# Supplementary material for: Large scale climate signals of a European oxygen isotope network from tree-rings – predominantly caused by ENSO teleconnections?
Source: Copernicus journal article supplement (doi:10.5194/cp-2020-39), 2020-03-30
Supplement: Supplementary file 1 [file cp-2020-39-supplement.pdf]

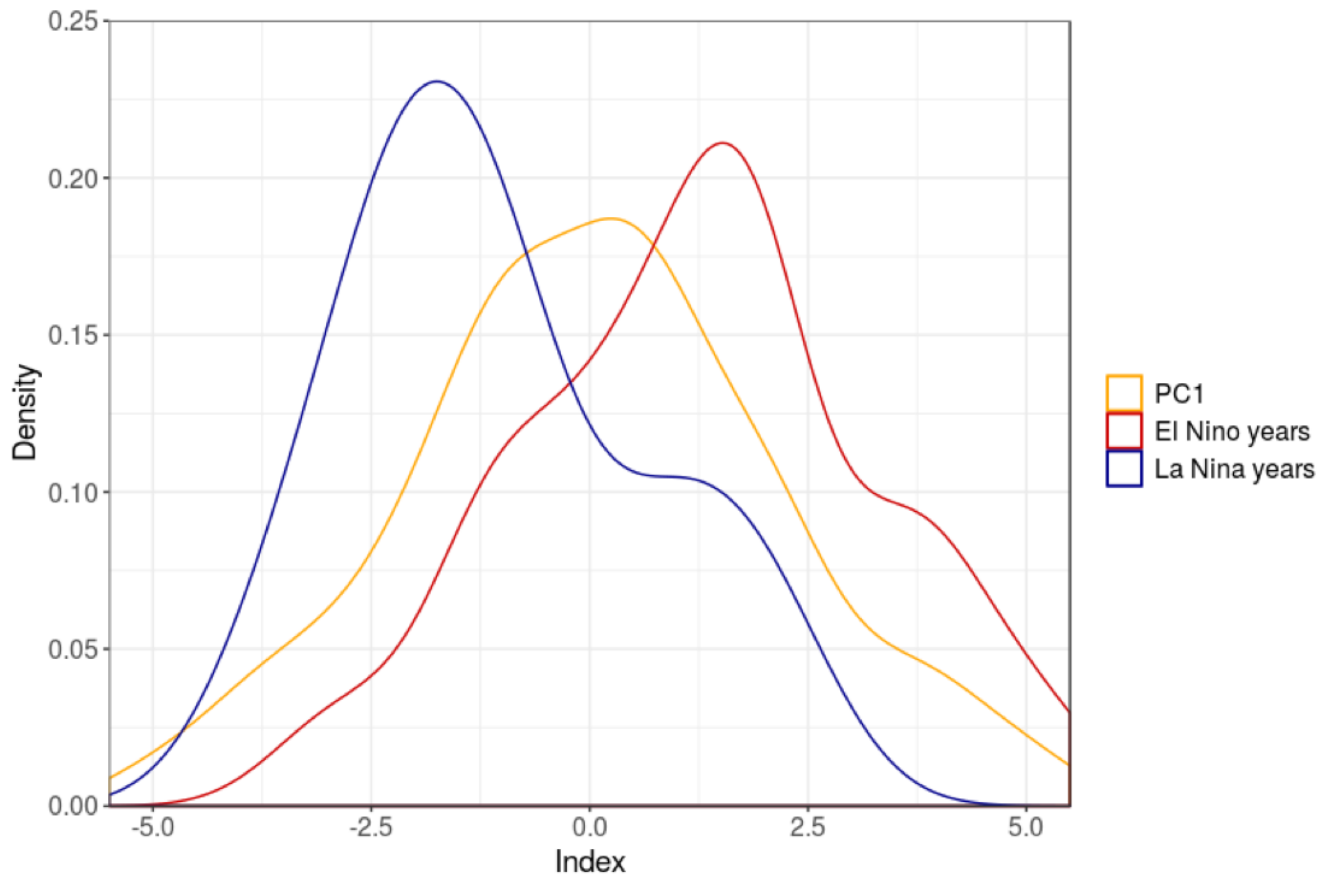

**Supplement 1: The density function of PC1 with two additional functions for El Niño and La Niña years.** The El Niño and La Niña years have been extracted out of a Niño 3.4 DJF index (HadISST1; Rayner et al. 2003) for the period from 1870 to 2000.

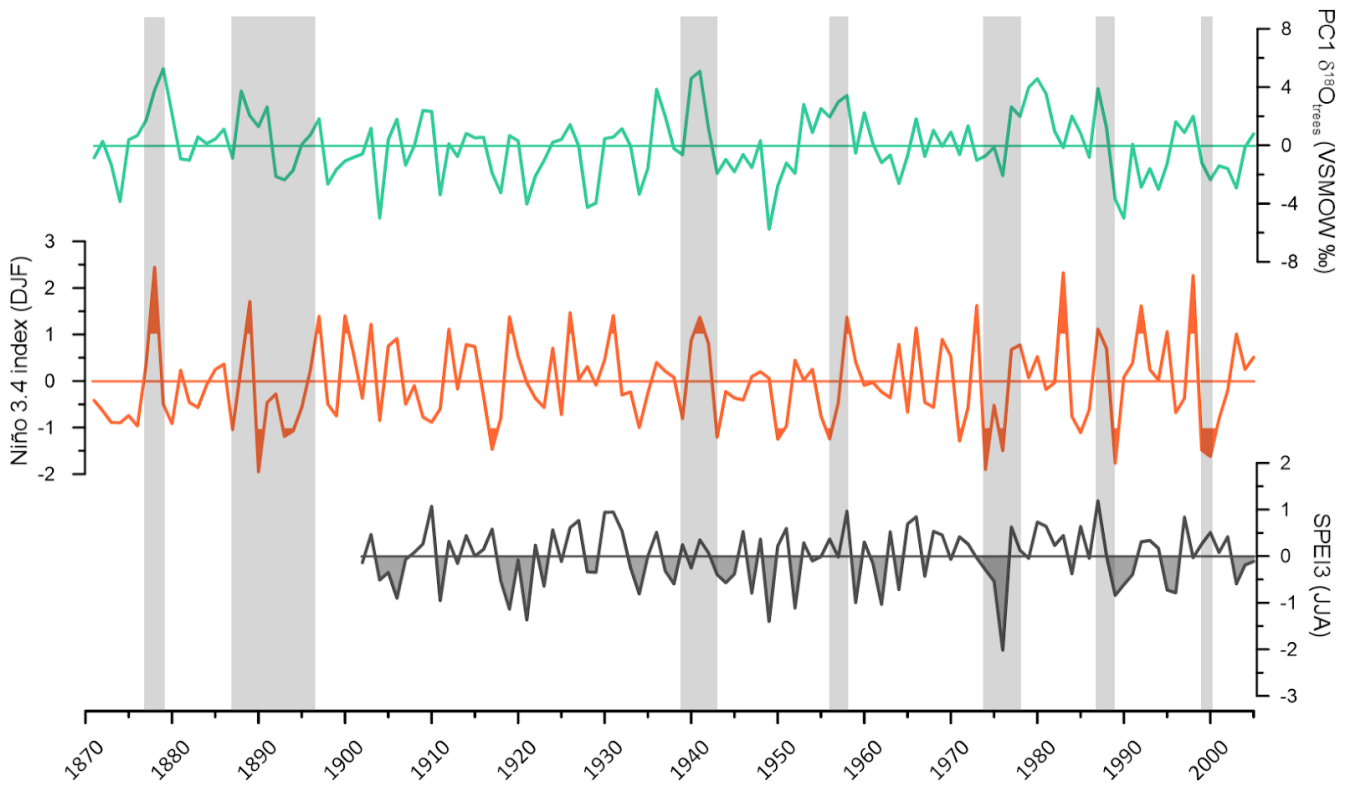

**Supplement 2: The time series of the first component of the stable oxygen isotope network in comparison to other time series of climate patterns.** For a better comparison, a Niño 3.4 index for DJF (HadISST1; Rayner et al. 2003) and a SPEI3 drought index (SPEIbase v.2.5 [SPEI3]; Longitude  $-5^{\circ}$  to  $10^{\circ}$ /Latitude  $46^{\circ}$  to  $52^{\circ}$ ) are shown. Selected El Niño and La Niña events are highlighted via a grey background.

10
